# Supplementary material for: A single-cell transcriptome atlas of the maturing zebrafish telencephalon
Source: HighWire-hosted journal article supplement (doi:10.1101/gr.277278.122), 2023-04-01
Supplement: Supplemental_Table_S1.zip [file Supplemental_Table_S1-legend.docx]

**Supplemental Table S1. Markers for all integrated telencephalon clusters across all ages.**
