# Supplementary material for: A single-cell transcriptome atlas of the maturing zebrafish telencephalon
Source: HighWire-hosted journal article supplement (doi:10.1101/gr.277278.122), 2023-04-01
Supplement: Supplemental_Table_S2.zip [file Supplemental_Table_S2-legend.docx]

**Supplemental Table S2. Primers for generating *in situ* probes.**
