# Supplementary material for: A single-cell transcriptome atlas of the maturing zebrafish telencephalon
Source: HighWire-hosted journal article supplement (doi:10.1101/gr.277278.122), 2023-04-01
Supplement: Supplemental_Table_S3.zip [file Supplemental_Table_S3.docx]

| **Mouse Gene** | **Zebrafish Gene** | **Mammalian Expression** | **References** |
| --- | --- | --- | --- |
| Dlx1 | dlx1a | Subpallium; delineates pallio-subpallial boundary | 1 |
| Dlx2 | dlx2a, dlx2b | Subpallium; delineates pallio-subpallial boundary | 1; 2 |
| Dlx5 | dlx5a | Subpallium; delineates pallio-subpallial boundary | 1; 3 |
| Dlx6 | dlx6a | Subpallium; delineates pallio-subpallial boundary | 3 |
| Tbr1 | tbr1b | Pallium; delineates pallio-subpallial boundary | 2 |
| Neurod1 | neurod1 | Pallium; delineates pallio-subpallial boundary | 4; 5 |
| Nkx2.1 | nkx2.1 | Medial ganglionic eminence; specifies interneurons towards an MGE fate; required for cholinergic neuron development | 6-9 |
| Lhx6 | lhx6 | Required for development of somatostatin+ and parvalbumin+ interneurons | 8; 10; 11 |
| Sst | sst1.1 | Somatostatin+ interneurons | 12 |
| Npy | npy | Neuropeptide Y+ interneurons | 12 |
| Sox6 | sox6 | Somatostatin+ and parvalbumin+ interneurons; downstream of Lhx6 | 13; 14 |
| Etv1 (Er81) | etv1 | Parvalbumin+ basket cells | 15; 16 |
| Nxph1 | nxph1 | Medial ganglionic eminence-derived interneurons | 17; 18 |
| Pvalb | pvalb6, pvalb7 | Parvalbumin+ interneurons | 14 |
| Lhx8 | lhx8a | Forebrain cholinergic neurons | 19-22 |
| Gbx1 | gbx1 | Forebrain cholinergic neurons; ventral pallidum; globus pallidus | 19; 18 |
| Calb1 | calb1 | Calbindin+ interneurons | 23 |
| Isl1 | isl1 | Basal ganglia and septum; forebrain cholinergic neurons | 24-27; 22 |
| Zic1 | zic1 | Septum | 28; 29 |
| Zic2 | zic2a | Septum | 30; 29; 31 |
| Zic4 | zic4 | Septum | 32; 33; 29 |
| Zic5 | zic5 | Septum | 29; 18 |
| Slc17a6 | slc17a6a, slc17a6b | Glutamatergic neurons | 34 |
| Slc32a1 | slc32a1 | GABAergic neurons | 35 |
| Slc6a1 | slc6a1b | GABAergic neurons | 36 |
| Gad1 | gad1b | GABAergic neurons | 37 |
| Gad2 | gad2 | GABAergic neurons | 37 |
| Tac1 | tac1 | Medium spiny neurons | 38; 39 |
| Sp8 | sp8a | Medium spiny neurons | 40 |
| Synpr | synpr | Medium spiny neurons | 41; 42 |
| Pyy | pyya, pyyb | Peptide YY; murine medulla | 43; 44 |
| Penk | penkb | Medium spiny neurons | 38; 39 |
| Six3 | six3b | Medium spiny neurons | 40; 45 |
| Cxcl14 | cxcl14 | Medium spiny neurons | 41; 42 |
| Foxp1 | foxp1b | Medium spiny neurons | 41; 46 |
| Rgs4 | rgs4 | Multiple locations including cortex, hippocampus, and striatum | 47; 48 |
| Ncald | ncaldb | Multiple locations | 29; 49 |
| Gm34066 | c16h2orf66 | Uncharacterized |  |
| Prdm12 | prdm12b | Postmitotic neurons in E12.5 septum, striatum, and pallio-subpallial boundary | 50; 51 |
|  | si:ch73-386o14.1 | Uncharacterized |  |
| Gfra2 | gfra2b | Multiple locations | 52; 29 |
| Drd2 | drd2b | D2 dopamine receptor | 53 |
| Nr2f2 (COUP-TFII) | nr2f2 | Interneurons derived from caudal ganglionic eminence | 54 |
| Prox1 | prox1a, prox1b | Interneurons derived from lateral and caudal ganglionic eminences | 55 |
| Calb2 | calb2a, calb2b | Calretinin+ interneurons | 56 |
| Vip | vip | Vasoactive intestinal polypeptide+ interneurons | 57 |
| Lhx9 | lhx9 | Medial pallium; ventral pallium | 58 |
| Lhx2 | lhx2b | Medial pallium; dorsal pallium; lateral pallium; ventral pallium | 58 |
| Lhx5 | lhx5 | Cajal-Retzius cells; pallial septum | 59; 58 |
| Lhx1 | lhx1a | Cajal-Retzius cells; pallial septum | 60; 59 |
| Otp | otpa | Hypothalamic neuroendocrine neurons; medial extended amygdala neurons | 61; 62 |
| Fezf1 | fezf1 | Prethalamus; olfactory bulb; ventrolateral pallium | 63; 64 |
| Pdyn | pdyn | Striatum; pallidum; hypothalamus | 65; 29 |
| Emx2 | emx2 | Developing pallium; cortex | 66; 67 |
| Eomes | eomesa | Hippocampus; olfactory bulb; neuroblasts | 68; 69 |
| Gfra1 | gfra1a | Medial habenula; dentate gyrus | 65 |
| Emx1 | emx1 | Developing pallium; cortex | 66; 67 |
| Rprm | rprma | Subiculum, piriform area, postpiriform transition area, piriform-amygdalar area, lateral amygdalar nucleus | 65 |
| Rspo2 | rspo2 | Basolateral amygdala; entorhinal cortex; subiculum | 65; 70; 29 |
| Cbln1 | cbln1 | Subiculum; entorhinal cortex | 65; 71; 29 |
| Tshz1 | tshz1 | Amygdalar intercalated cells; accessory olfactory bulb; striatum | 65; 72; 29 |
|  | emx3 |  |  |
| Efna1 | efna1b | Subiculum; dentate gyrus; amygdala | 65; 29 |
| Ptp4a3 | PTP4A3 (1 of many) | Isocortex; hippocampus; amygdala; striatum | 29; 73 |
| Cpne4 | cpne4a | Piriform cortex; hippocampus | 29; 73 |
| Cplx1 | cplx2l | Isocortex; hippocampus; amygdala | 29 |
| Ctgf | ctgfa | Isocortex | 29 |
| Bcl2l13 | bc2l13 | Isocortex; hippocampus; amygdala; neural progenitor cells | 74; 29 |
| Zfp536 | znf536 | Piriform cortex; anterior olfactory nucleus | 65; 29 |
| Ccdc136 | ccdc136a | Isocortex; hippocampus | 29 |
| Fam43b | fam43b | Isocortex; hippocampus | 29; 75 |
| Nell2 | nell2b | Isocortex; hippocampus; amygdala | 65 |
| Olfm1 | olfm1a | Isocortex; hippocampus | 29 |
| Cdh8 | cdh8 | Isocortex; hippocampus | 29 |
| Atp1a3 | atp1a3b | Isocortex; hippocampus | 29 |
| C1ql3 | c1ql3b.1 | Isocortex; hippocampus; basolateral amygdala | 76; 29; 77 |
| Nptx1 | nptx1l | Isocortex; CA3; basolateral amygdala | 65; 29; 77 |
| Neurod6 | neurod6a | CA1; CA2; CA3; dentate gyrus; subiculum | 65; 29 |
| Fndc5 | fndc5b | Olfactory bulb; CA1; CA3 | 65 |
| Chga | chga | Entorhinal area; subiculum; piriform area; basolateral amygdala; isocortex | 65 |
| Jun | jun | Ubiquitous | 65; 29 |
| Rtn4rl2 | rtn4rl2a, rtn4rl2b | Isocortex; CA1; CA3 | 65; 29 |
| Eif4ebp3 | eif4ebp3l | Accessory olfactory bulb; nucleus of the lateral olfactory tract | 65; 29 |
| Ucn | uts1 | Entorhinal area; nucleus of the lateral olfactory tract | 65 |
| Snap25 | snap25b | Isocortex; subiculum; entorhinal area | 65 |

1. Eisenstat DD, Liu JK, Mione M, Zhong W, Yu G, Anderson SA, Ghattas I, Puelles L, Rubenstein JL. 1999. DLX-1, DLX-2, and DLX-5 expression define distinct stages of basal forebrain differentiation. *J Comp Neurol* **414**: 217-237.

2. Puelles L, Kuwana E, Puelles E, Bulfone A, Shimamura K, Keleher J, Smiga S, Rubenstein JL. 2000. Pallial and subpallial derivatives in the embryonic chick and mouse telencephalon, traced by the expression of the genes Dlx-2, Emx-1, Nkx-2.1, Pax-6, and Tbr-1. *J Comp Neurol* **424**: 409-438.

3. Wang Y, Dye CA, Sohal V, Long JE, Estrada RC, Roztocil T, Lufkin T, Deisseroth K, Baraban SC, Rubenstein JL. 2010. Dlx5 and Dlx6 regulate the development of parvalbumin-expressing cortical interneurons. *J Neurosci* **30**: 5334-5345.

4. Schwab MH, Druffel-Augustin S, Gass P, Jung M, Klugmann M, Bartholomae A, Rossner MJ, Nave KA. 1998. Neuronal basic helix-loop-helix proteins (NEX, neuroD, NDRF): spatiotemporal expression and targeted disruption of the NEX gene in transgenic mice. *J Neurosci* **18**: 1408-1418.

5. Schwab MH, Bartholomae A, Heimrich B, Feldmeyer D, Druffel-Augustin S, Goebbels S, Naya FJ, Zhao S, Frotscher M, Tsai MJ et al. 2000. Neuronal basic helix-loop-helix proteins (NEX and BETA2/Neuro D) regulate terminal granule cell differentiation in the hippocampus. *J Neurosci* **20**: 3714-3724.

6. Sussel L, Marin O, Kimura S, Rubenstein JL. 1999. Loss of Nkx2.1 homeobox gene function results in a ventral to dorsal molecular respecification within the basal telencephalon: evidence for a transformation of the pallidum into the striatum. *Development* **126**: 3359-3370.

7. Xu Q, Cobos I, De La Cruz E, Rubenstein JL, Anderson SA. 2004. Origins of cortical interneuron subtypes. *J Neurosci* **24**: 2612-2622.

8. Butt SJ, Cobos I, Golden J, Kessaris N, Pachnis V, Anderson S. 2007. Transcriptional regulation of cortical interneuron development. *J Neurosci* **27**: 11847-11850.

9. Magno L, Barry C, Schmidt-Hieber C, Theodotou P, Hausser M, Kessaris N. 2017. NKX2-1 Is Required in the Embryonic Septum for Cholinergic System Development, Learning, and Memory. *Cell Rep* **20**: 1572-1584.

10. Liodis P, Denaxa M, Grigoriou M, Akufo-Addo C, Yanagawa Y, Pachnis V. 2007. Lhx6 activity is required for the normal migration and specification of cortical interneuron subtypes. *J Neurosci* **27**: 3078-3089.

11. Zhao Y, Flandin P, Long JE, Cuesta MD, Westphal H, Rubenstein JL. 2008. Distinct molecular pathways for development of telencephalic interneuron subtypes revealed through analysis of Lhx6 mutants. *J Comp Neurol* **510**: 79-99.

12. Freund TF, Buzsaki G. 1996. Interneurons of the hippocampus. *Hippocampus* **6**: 347-470.

13. Batista-Brito R, Rossignol E, Hjerling-Leffler J, Denaxa M, Wegner M, Lefebvre V, Pachnis V, Fishell G. 2009. The cell-intrinsic requirement of Sox6 for cortical interneuron development. *Neuron* **63**: 466-481.

14. Munguba H, Chattopadhyaya B, Nilsson S, Carrico JN, Memic F, Oberst P, Batista-Brito R, Munoz-Manchado AB, Wegner M, Fishell G et al. 2021. Postnatal Sox6 Regulates Synaptic Function of Cortical Parvalbumin-Expressing Neurons. *J Neurosci* **41**: 8876-8886.

15. Flames N, Pla R, Gelman DM, Rubenstein JL, Puelles L, Marin O. 2007. Delineation of multiple subpallial progenitor domains by the combinatorial expression of transcriptional codes. *J Neurosci* **27**: 9682-9695.

16. Dehorter N, Ciceri G, Bartolini G, Lim L, del Pino I, Marin O. 2015. Tuning of fast-spiking interneuron properties by an activity-dependent transcriptional switch. *Science* **349**: 1216-1220.

17. Batista-Brito R, Machold R, Klein C, Fishell G. 2008. Gene expression in cortical interneuron precursors is prescient of their mature function. *Cereb Cortex* **18**: 2306-2317.

18. Su-Feher L, Rubin AN, Silberberg SN, Catta-Preta R, Lim KJ, Ypsilanti AR, Zdilar I, McGinnis CS, McKinsey GL, Rubino TE, Jr. et al. 2022. Single cell enhancer activity distinguishes GABAergic and cholinergic lineages in embryonic mouse basal ganglia. *Proc Natl Acad Sci U S A* **119**: e2108760119.

19. Asbreuk CH, van Schaick HS, Cox JJ, Kromkamp M, Smidt MP, Burbach JP. 2002. The homeobox genes Lhx7 and Gbx1 are expressed in the basal forebrain cholinergic system. *Neuroscience* **109**: 287-298.

20. Zhao Y, Marin O, Hermesz E, Powell A, Flames N, Palkovits M, Rubenstein JL, Westphal H. 2003. The LIM-homeobox gene Lhx8 is required for the development of many cholinergic neurons in the mouse forebrain. *Proc Natl Acad Sci U S A* **100**: 9005-9010.

21. Lopes R, Verhey van Wijk N, Neves G, Pachnis V. 2012. Transcription factor LIM homeobox 7 (Lhx7) maintains subtype identity of cholinergic interneurons in the mammalian striatum. *Proc Natl Acad Sci U S A* **109**: 3119-3124.

22. Ncube D, Tallafuss A, Serafin J, Bruckner J, Farnsworth DR, Miller AC, Eisen JS, Washbourne P. 2022. A conserved transcriptional fingerprint of multi-neurotransmitter neurons necessary for social behavior. *BMC Genomics* **23**: 675.

23. Anderson SA, Eisenstat DD, Shi L, Rubenstein JL. 1997. Interneuron migration from basal forebrain to neocortex: dependence on Dlx genes. *Science* **278**: 474-476.

24. Elshatory Y, Gan L. 2008. The LIM-homeobox gene Islet-1 is required for the development of restricted forebrain cholinergic neurons. *J Neurosci* **28**: 3291-3297.

25. Fragkouli A, van Wijk NV, Lopes R, Kessaris N, Pachnis V. 2009. LIM homeodomain transcription factor-dependent specification of bipotential MGE progenitors into cholinergic and GABAergic striatal interneurons. *Development* **136**: 3841-3851.

26. Long JE, Cobos I, Potter GB, Rubenstein JL. 2009. Dlx1&2 and Mash1 transcription factors control MGE and CGE patterning and differentiation through parallel and overlapping pathways. *Cereb Cortex* **19 Suppl 1**: i96-106.

27. Cho HH, Cargnin F, Kim Y, Lee B, Kwon RJ, Nam H, Shen R, Barnes AP, Lee JW, Lee S et al. 2014. Isl1 directly controls a cholinergic neuronal identity in the developing forebrain and spinal cord by forming cell type-specific complexes. *PLoS Genet* **10**: e1004280.

28. Inoue T, Ota M, Ogawa M, Mikoshiba K, Aruga J. 2007. Zic1 and Zic3 regulate medial forebrain development through expansion of neuronal progenitors. *J Neurosci* **27**: 5461-5473.

29. Zeisel A, Hochgerner H, Lonnerberg P, Johnsson A, Memic F, van der Zwan J, Haring M, Braun E, Borm LE, La Manno G et al. 2018. Molecular Architecture of the Mouse Nervous System. *Cell* **174**: 999-1014 e1022.

30. Murillo B, Ruiz-Reig N, Herrera M, Fairen A, Herrera E. 2015. Zic2 Controls the Migration of Specific Neuronal Populations in the Developing Forebrain. *J Neurosci* **35**: 11266-11280.

31. Woych J, Ortega Gurrola A, Deryckere A, Jaeger ECB, Gumnit E, Merello G, Gu J, Joven Araus A, Leigh ND, Yun M et al. 2022. Cell-type profiling in salamanders identifies innovations in vertebrate forebrain evolution. *Science* **377**: eabp9186.

32. Gaston-Massuet C, Henderson DJ, Greene ND, Copp AJ. 2005. Zic4, a zinc-finger transcription factor, is expressed in the developing mouse nervous system. *Dev Dyn* **233**: 1110-1115.

33. Rubin AN, Alfonsi F, Humphreys MP, Choi CK, Rocha SF, Kessaris N. 2010. The germinal zones of the basal ganglia but not the septum generate GABAergic interneurons for the cortex. *J Neurosci* **30**: 12050-12062.

34. Bai L, Xu H, Collins JF, Ghishan FK. 2001. Molecular and functional analysis of a novel neuronal vesicular glutamate transporter. *J Biol Chem* **276**: 36764-36769.

35. McIntire SL, Reimer RJ, Schuske K, Edwards RH, Jorgensen EM. 1997. Identification and characterization of the vesicular GABA transporter. *Nature* **389**: 870-876.

36. Guastella J, Nelson N, Nelson H, Czyzyk L, Keynan S, Miedel MC, Davidson N, Lester HA, Kanner BI. 1990. Cloning and expression of a rat brain GABA transporter. *Science* **249**: 1303-1306.

37. Kaufman DL, Houser CR, Tobin AJ. 1991. Two forms of the gamma-aminobutyric acid synthetic enzyme glutamate decarboxylase have distinct intraneuronal distributions and cofactor interactions. *J Neurochem* **56**: 720-723.

38. Gerfen CR, Young WS, 3rd. 1988. Distribution of striatonigral and striatopallidal peptidergic neurons in both patch and matrix compartments: an in situ hybridization histochemistry and fluorescent retrograde tracing study. *Brain Res* **460**: 161-167.

39. Lobo MK, Karsten SL, Gray M, Geschwind DH, Yang XW. 2006. FACS-array profiling of striatal projection neuron subtypes in juvenile and adult mouse brains. *Nat Neurosci* **9**: 443-452.

40. Xu Z, Liang Q, Song X, Zhang Z, Lindtner S, Li Z, Wen Y, Liu G, Guo T, Qi D et al. 2018. SP8 and SP9 coordinately promote D2-type medium spiny neuron production by activating Six3 expression. *Development* **145**.

41. Gokce O, Stanley GM, Treutlein B, Neff NF, Camp JG, Malenka RC, Rothwell PE, Fuccillo MV, Sudhof TC, Quake SR. 2016. Cellular Taxonomy of the Mouse Striatum as Revealed by Single-Cell RNA-Seq. *Cell Rep* **16**: 1126-1137.

42. Stanley G, Gokce O, Malenka RC, Sudhof TC, Quake SR. 2020. Continuous and Discrete Neuron Types of the Adult Murine Striatum. *Neuron* **105**: 688-699 e688.

43. Pieribone VA, Brodin L, Friberg K, Dahlstrand J, Soderberg C, Larhammar D, Hokfelt T. 1992. Differential expression of mRNAs for neuropeptide Y-related peptides in rat nervous tissues: possible evolutionary conservation. *J Neurosci* **12**: 3361-3371.

44. Soderberg C, Wraith A, Ringvall M, Yan YL, Postlethwait JH, Brodin L, Larhammar D. 2000. Zebrafish genes for neuropeptide Y and peptide YY reveal origin by chromosome duplication from an ancestral gene linked to the homeobox cluster. *J Neurochem* **75**: 908-918.

45. Song X, Chen H, Shang Z, Du H, Li Z, Wen Y, Liu G, Qi D, You Y, Yang Z et al. 2021. Homeobox Gene Six3 is Required for the Differentiation of D2-Type Medium Spiny Neurons. *Neurosci Bull* **37**: 985-998.

46. Precious SV, Kelly CM, Reddington AE, Vinh NN, Stickland RC, Pekarik V, Scherf C, Jeyasingham R, Glasbey J, Holeiter M et al. 2016. FoxP1 marks medium spiny neurons from precursors to maturity and is required for their differentiation. *Exp Neurol* **282**: 9-18.

47. Nomoto S, Adachi K, Yang LX, Hirata Y, Muraguchi S, Kiuchi K. 1997. Distribution of RGS4 mRNA in mouse brain shown by in situ hybridization. *Biochem Biophys Res Commun* **241**: 281-287.

48. Grillet N, Pattyn A, Contet C, Kieffer BL, Goridis C, Brunet JF. 2005. Generation and characterization of Rgs4 mutant mice. *Mol Cell Biol* **25**: 4221-4228.

49. Upadhyay A, Hosseinibarkooie S, Schneider S, Kaczmarek A, Torres-Benito L, Mendoza-Ferreira N, Overhoff M, Rombo R, Grysko V, Kye MJ et al. 2019. Neurocalcin Delta Knockout Impairs Adult Neurogenesis Whereas Half Reduction Is Not Pathological. *Front Mol Neurosci* **12**: 19.

50. Kinameri E, Inoue T, Aruga J, Imayoshi I, Kageyama R, Shimogori T, Moore AW. 2008. Prdm proto-oncogene transcription factor family expression and interaction with the Notch-Hes pathway in mouse neurogenesis. *PLoS One* **3**: e3859.

51. Baba A, Suwada T, Muta S, Kuhara S, Tashiro K. 2022. Prdm12 regulates inhibitory neuron differentiation in mouse embryonal carcinoma cells. *Cytotechnology* **74**: 329-339.

52. Burazin TC, Gundlach AL. 1999. Localization of GDNF/neurturin receptor (c-ret, GFRalpha-1 and alpha-2) mRNAs in postnatal rat brain: differential regional and temporal expression in hippocampus, cortex and cerebellum. *Brain Res Mol Brain Res* **73**: 151-171.

53. Bunzow JR, Van Tol HH, Grandy DK, Albert P, Salon J, Christie M, Machida CA, Neve KA, Civelli O. 1988. Cloning and expression of a rat D2 dopamine receptor cDNA. *Nature* **336**: 783-787.

54. Kanatani S, Yozu M, Tabata H, Nakajima K. 2008. COUP-TFII is preferentially expressed in the caudal ganglionic eminence and is involved in the caudal migratory stream. *J Neurosci* **28**: 13582-13591.

55. Rubin AN, Kessaris N. 2013. PROX1: a lineage tracer for cortical interneurons originating in the lateral/caudal ganglionic eminence and preoptic area. *PLoS One* **8**: e77339.

56. Jacobowitz DM, Winsky L. 1991. Immunocytochemical localization of calretinin in the forebrain of the rat. *J Comp Neurol* **304**: 198-218.

57. Kubota Y, Hattori R, Yui Y. 1994. Three distinct subpopulations of GABAergic neurons in rat frontal agranular cortex. *Brain Res* **649**: 159-173.

58. Abellan A, Desfilis E, Medina L. 2014. Combinatorial expression of Lef1, Lhx2, Lhx5, Lhx9, Lmo3, Lmo4, and Prox1 helps to identify comparable subdivisions in the developing hippocampal formation of mouse and chicken. *Front Neuroanat* **8**: 59.

59. Abellan A, Vernier B, Retaux S, Medina L. 2010. Similarities and differences in the forebrain expression of Lhx1 and Lhx5 between chicken and mouse: Insights for understanding telencephalic development and evolution. *J Comp Neurol* **518**: 3512-3528.

60. Abellan A, Menuet A, Dehay C, Medina L, Retaux S. 2010. Differential expression of LIM-homeodomain factors in Cajal-Retzius cells of primates, rodents, and birds. *Cereb Cortex* **20**: 1788-1798.

61. Wang W, Lufkin T. 2000. The murine Otp homeobox gene plays an essential role in the specification of neuronal cell lineages in the developing hypothalamus. *Dev Biol* **227**: 432-449.

62. Garcia-Moreno F, Pedraza M, Di Giovannantonio LG, Di Salvio M, Lopez-Mascaraque L, Simeone A, De Carlos JA. 2010. A neuronal migratory pathway crossing from diencephalon to telencephalon populates amygdala nuclei. *Nat Neurosci* **13**: 680-689.

63. Hirata T, Nakazawa M, Muraoka O, Nakayama R, Suda Y, Hibi M. 2006. Zinc-finger genes Fez and Fez-like function in the establishment of diencephalon subdivisions. *Development* **133**: 3993-4004.

64. Hirata T, Nakazawa M, Yoshihara S, Miyachi H, Kitamura K, Yoshihara Y, Hibi M. 2006. Zinc-finger gene Fez in the olfactory sensory neurons regulates development of the olfactory bulb non-cell-autonomously. *Development* **133**: 1433-1443.

65. Lein ES Hawrylycz MJ Ao N Ayres M Bensinger A Bernard A Boe AF Boguski MS Brockway KS Byrnes EJ et al. 2007. Genome-wide atlas of gene expression in the adult mouse brain. *Nature* **445**: 168-176.

66. Gulisano M, Broccoli V, Pardini C, Boncinelli E. 1996. Emx1 and Emx2 show different patterns of expression during proliferation and differentiation of the developing cerebral cortex in the mouse. *Eur J Neurosci* **8**: 1037-1050.

67. Bishop KM, Garel S, Nakagawa Y, Rubenstein JL, O'Leary DD. 2003. Emx1 and Emx2 cooperate to regulate cortical size, lamination, neuronal differentiation, development of cortical efferents, and thalamocortical pathfinding. *J Comp Neurol* **457**: 345-360.

68. Bulfone A, Martinez S, Marigo V, Campanella M, Basile A, Quaderi N, Gattuso C, Rubenstein JL, Ballabio A. 1999. Expression pattern of the Tbr2 (Eomesodermin) gene during mouse and chick brain development. *Mech Dev* **84**: 133-138.

69. Kimura N, Nakashima K, Ueno M, Kiyama H, Taga T. 1999. A novel mammalian T-box-containing gene, Tbr2, expressed in mouse developing brain. *Brain Res Dev Brain Res* **115**: 183-193.

70. Kim J, Pignatelli M, Xu S, Itohara S, Tonegawa S. 2016. Antagonistic negative and positive neurons of the basolateral amygdala. *Nat Neurosci* **19**: 1636-1646.

71. Otsuka S, Konno K, Abe M, Motohashi J, Kohda K, Sakimura K, Watanabe M, Yuzaki M. 2016. Roles of Cbln1 in Non-Motor Functions of Mice. *J Neurosci* **36**: 11801-11816.

72. Kuerbitz J, Arnett M, Ehrman S, Williams MT, Vorhees CV, Fisher SE, Garratt AN, Muglia LJ, Waclaw RR, Campbell K. 2018. Loss of Intercalated Cells (ITCs) in the Mouse Amygdala of Tshz1 Mutants Correlates with Fear, Depression, and Social Interaction Phenotypes. *J Neurosci* **38**: 1160-1177.

73. Reshetnikov VV, Kisaretova PE, Ershov NI, Shulyupova AS, Oshchepkov DY, Klimova NV, Ivanchihina AV, Merkulova TI, Bondar NP. 2020. Genes associated with cognitive performance in the Morris water maze: an RNA-seq study. *Sci Rep* **10**: 22078.

74. Schouten M, Fratantoni SA, Hubens CJ, Piersma SR, Pham TV, Bielefeld P, Voskuyl RA, Lucassen PJ, Jimenez CR, Fitzsimons CP. 2015. MicroRNA-124 and -137 cooperativity controls caspase-3 activity through BCL2L13 in hippocampal neural stem cells. *Sci Rep* **5**: 12448.

75. Zhang H, Wang H, Shen X, Jia X, Yu S, Qiu X, Wang Y, Du J, Yan J, He J. 2021. The landscape of regulatory genes in brain-wide neuronal phenotypes of a vertebrate brain. *Elife* **10**.

76. Martinelli DC, Chew KS, Rohlmann A, Lum MY, Ressl S, Hattar S, Brunger AT, Missler M, Sudhof TC. 2016. Expression of C1ql3 in Discrete Neuronal Populations Controls Efferent Synapse Numbers and Diverse Behaviors. *Neuron* **91**: 1034-1051.

77. Sticco MJ, Pena Palomino PA, Lukacsovich D, Thompson BL, Foldy C, Ressl S, Martinelli DC. 2021. C1QL3 promotes cell-cell adhesion by mediating complex formation between ADGRB3/BAI3 and neuronal pentraxins. *FASEB J* **35**: e21194.
