# Supplementary material for: A single-cell transcriptome atlas of the maturing zebrafish telencephalon
Source: HighWire-hosted journal article supplement (doi:10.1101/gr.277278.122), 2023-04-01
Supplement: Supplemental_Table_S4.zip [file Supplemental_Table_S4-legend.docx]

**Supplemental Table S4. Differentially enriched genes between 15 dpf and 6 dpf animals for every mature pallium and subpallium cluster.**
