# Supplementary material for: A single-cell transcriptome atlas of the maturing zebrafish telencephalon
Source: HighWire-hosted journal article supplement (doi:10.1101/gr.277278.122), 2023-04-01
Supplement: Supplemental_Table_S7.zip [file Supplemental_Table_S7-legend.docx]

**Supplemental Table S7. Markers for all clusters in the 6 dpf data using a clustering resolution of 1.7.**
